# Supplementary material for: Modular UBE2H-CTLH E2-E3 complexes regulate erythroid maturation
Source: eLife journal article supplement (doi:10.7554/elife.77937), 2022-11-24
Supplement: fig1-data1 [file elife-77937-fig1-data1-v1.pdf]

Figure 1D

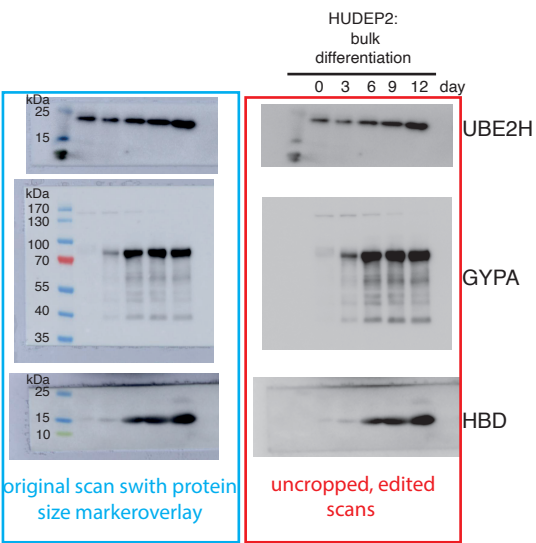

Figure 1E

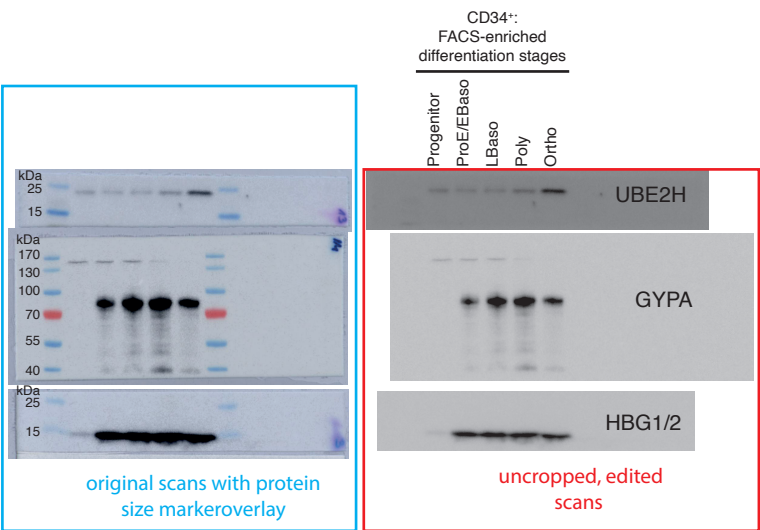

Figure 1—source data 1
