# Supplementary material for: Modular UBE2H-CTLH E2-E3 complexes regulate erythroid maturation
Source: eLife journal article supplement (doi:10.7554/elife.77937), 2022-11-24
Supplement: fig4-data1 [file elife-77937-fig4-data1-v1.pdf]

Figure 4A

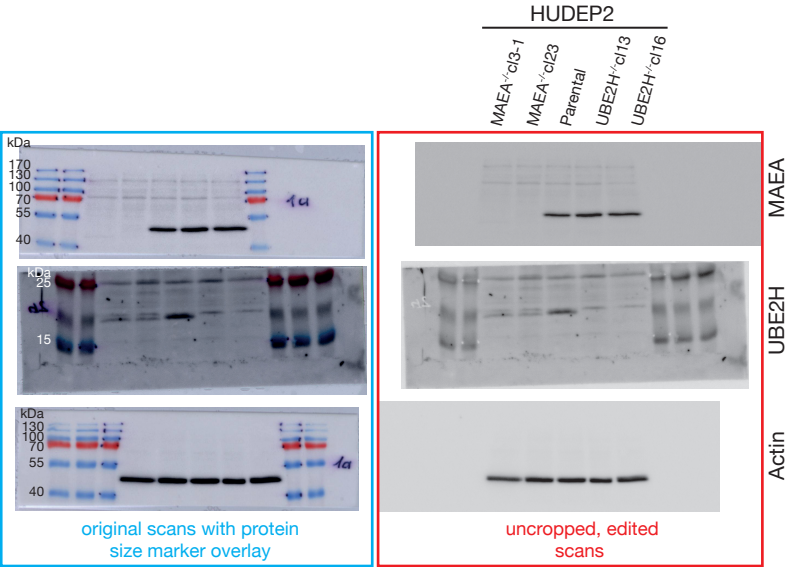

Figure 4–source data 1
